# Supplementary material for: Effectiveness of Semi-Supervised Active Learning in Automated Wound Image Segmentation
Source: MDPI journal article supplement (doi:10.3390/ijms24010706), 2022-12-31
Supplement: s1 [file s1]

## Supplementary Materials

A second validation was performed on the Medetec Wound Dataset [31] (MWD): the same dataset was used in the work of Wang et al. and it constitutes a second benchmark for our model. We used the version of MWD provided by Wang et al., which includes 38 images augmented with all possible flips, for a total of 152 samples. Also in this case, the resolution of the photos is more than 2x lower. The comparison of the results obtained by our U-Net model (trained on the *Deepskin* dataset) and the MobileNetV2 model of Wang et al. (trained on the FUSC dataset) is shown in Table S1.

|           | <b>Mobile<br/>NetV2</b> | <b>Our<br/>U-Net</b> |
|-----------|-------------------------|----------------------|
| DSC       | 0.96                    | 0.75                 |
| Precision | 0.97                    | 0.97                 |
| Recall    | 0.94                    | 0.60                 |

MWD

*Table S1. Comparison of the results obtained by the MobileNetV2 model (Wang et al.) and the U-Net model proposed in this work, on the MWD dataset. We re-trained the MobileNetV2 on the FUSC dataset for the reproducibility of Wang et al. results. The U-Net model was trained only on the Deepskin dataset as described in the Methods section. For both the models the MWD dataset can be considered as validation set.*
